# Supplementary material
Source: PubMed Central journal article supplement (PMC3547632)
Supplement: NIHMS415529-supplement-Supporting_Information.pdf [file NIHMS415529-supplement-Supporting_Information.pdf]

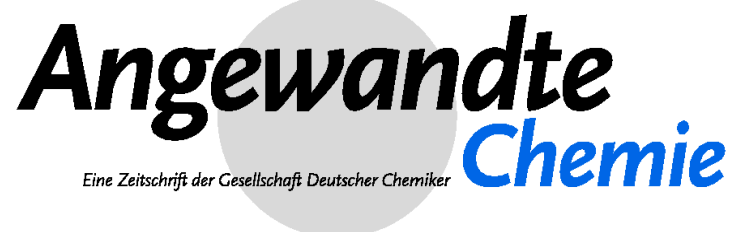

Supporting Information

© Wiley-VCH 2009

69451 Weinheim, Germany

# Supporting Information

## Plasmon-mediated Synthesis of Silver Triangular Bipyramids

Jian Zhang<sup>1</sup>, Shuzhou Li<sup>1</sup>, Jinsong Wu<sup>2</sup>, George C. Schatz<sup>1\*</sup>, and Chad A. Mirkin<sup>1\*</sup>

1. Department of Chemistry and International Institute for Nanotechnology, Northwestern University, 2145 Sheridan Road, Evanston, IL 60208-3113 (USA)

2. Department of Materials Science and Engineering, Northwestern University, 2145 Sheridan Road, Evanston, IL 60208-3108 (USA)

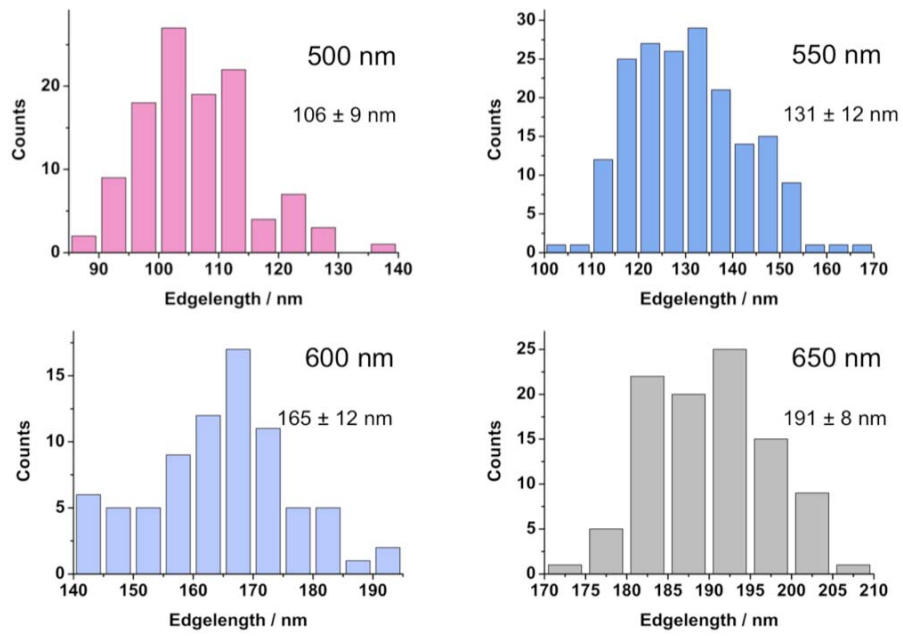

**Figure S1.** Statistical analysis of the edge length a of the triangular bipyramids obtained through irradiating at  $500\pm 20$ ,  $550\pm 20$ ,  $600\pm 20$ , and  $650\pm 20$  nm.

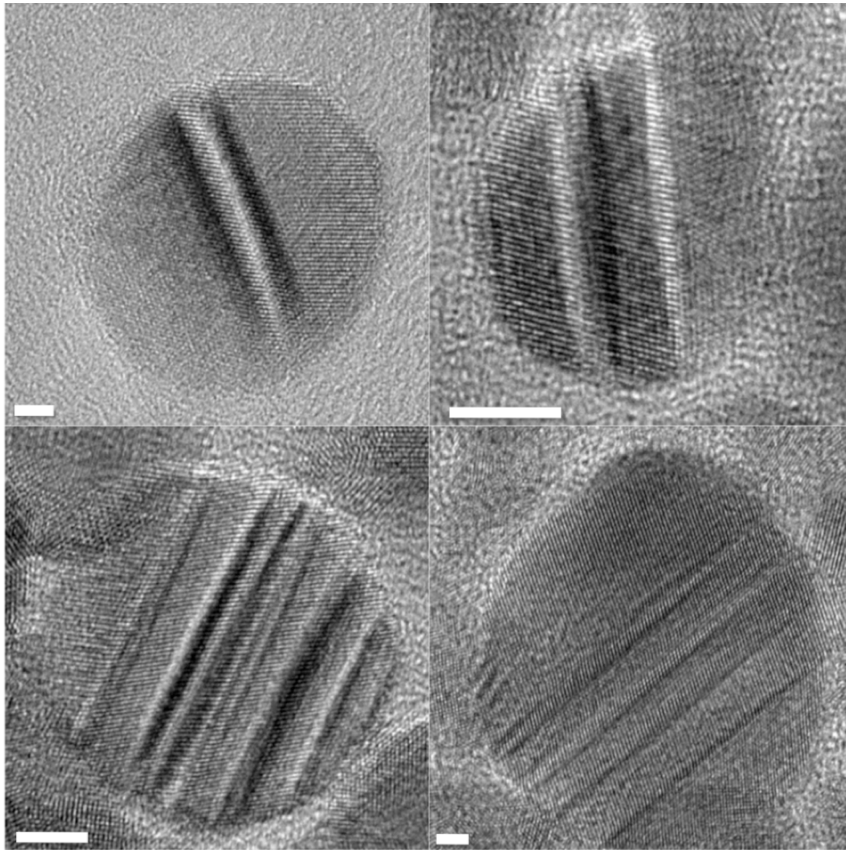

**Figure S2.** High-resolution TEM images of seeds (scale bar 2 nm) showing planar twinned planes and stacking faults when the reaction was stopped at one hour.
